# Supplementary material
Source: PubMed Central journal article supplement (PMC6251526)
Supplement: zsw029_suppl_Table_S1.pdf [file zsw029_suppl_Table_S1.pdf]

Table S1: Sample size for each level of Age Group and Self-Reported Hours of Sleep per Night

| Age Group | Self-Reported Hours of Sleep per Night |        |        |        |        |        |        |         |
|-----------|----------------------------------------|--------|--------|--------|--------|--------|--------|---------|
|           | 4                                      | 5      | 6      | 7      | 8      | 9      | 10     | Total   |
| 15-24     | 7,414                                  | 14,057 | 35,479 | 51,845 | 46,175 | 17,373 | 11,321 | 183,664 |
| 25-34     | 4,644                                  | 9,597  | 24,299 | 29,685 | 22,648 | 6,233  | 3,882  | 100,988 |
| 35-44     | 3,884                                  | 7,940  | 19,175 | 21,887 | 14,398 | 2,959  | 1,587  | 71,830  |
| 45-54     | 4,030                                  | 8,687  | 20,537 | 23,556 | 14,941 | 2,818  | 1,250  | 75,819  |
| 55-64     | 2,414                                  | 5,676  | 13,649 | 17,290 | 11,758 | 2,483  | 866    | 54,136  |
| 65-74     | 693                                    | 1,865  | 4,752  | 6,852  | 5,337  | 1,365  | 399    | 21,263  |
| 75-89     | 163                                    | 456    | 1,087  | 1,568  | 1,294  | 431    | 124    | 5,123   |
